# Supplementary material for: Highly efficient Nile red staining for the rapid quantification of microplastic number concentrations using flow cytometry
Source: Royal Society of Chemistry journal article supplement (doi:10.1039/d5ay01093d), 2025-01-01
Supplement: d5ay01093d1.xlsx [file d5ay01093d1.xlsx]

## Sheet: Fig.3
Fig. 3
THF concentration	Staining efficiency	Counting efficiency		Note: Each sample was measured in triplicate, and the mean value was presented.
volume %	-	-
4.7619	0.0762473	0.883342
9.90991	0.36595	0.908903
14.5299	0.98957	0.868199
20	0.990827	0.919283
24.812	0.993047	0.94589
30.0699	0.993028	0.91822
40.1198	0.99212	0.751932
50	0.915237	0.48807

## Sheet: Fig.4
Fig. 4	(a)	(a)	(b)	(c)	(c)	(c)	(c)	(c)	(c)
NR concentration	Staining efficiency	Counting efficiency	Modal FL signal intensity	FL signal intensity	Number concentration* (100 μg mL-1)	Number concentration* (50 μg mL-1)	Number concentration* (10 μg mL-1)	Number concentration* (5 μg mL-1)	Number concentration* (1 μg mL-1)		* Only events with FL signal intensity ≥428 mV were recorded.
μg mL-1	-	-	mV	mV	particles mL-1	particles mL-1	particles mL-1	particles mL-1	particles mL-1		Note: Each sample was measured in triplicate, and the mean value was presented.
1.15527	0.983283	0.896723	476	4
2.32693	0.990051	0.888027	500	12
5.96303	0.994056	0.944555	532	20
11.2651	0.993029	0.885422	524	28
22.6501	0.986561	0.986011	500	36
56.7666	0.911033	1.00957	460	44
114.639	0.00435807	0.957181	444	52
236.883	0.0712171	7.85506	436	60
343.879	0.27517	1.03873	436	68
				76
				84
				92
				100
				108
				116
				124
				132
				140
				148
				156
				164
				172
				180
				188
				196
				204
				212
				220
				228
				236
				244
				252
				260
				268
				276
				284
				292
				300
				308
				316
				324
				332
				340
				348
				356
				364
				372
				380
				388
				396
				404
				412
				420
				428	0	0	11.1111	333.333	2400
				436	15177.8	11511.1	3222.22	3811.11	788.889
				444	93066.7	2333.33	555.556	411.111	755.556
				452	922.222	45555.6	433.333	277.778	844.444
				460	88.8889	47700	522.222	333.333	1222.22
				468	55.5556	777.778	488.889	488.889	5088.89
				476	11.1111	500	511.111	377.778	47700
				484	0	44.4444	511.111	444.444	33611.1
				492	0	66.6667	677.778	433.333	55.5556
				500	11.1111	0	1122.22	555.556	33.3333
				508	0	22.2222	8344.44	1888.89	55.5556
				516	0	0	26633.3	10477.8	200
				524	0	0	38788.9	26677.8	344.444
				532	0	0	9922.22	36211.1	344.444
				540	0	0	177.778	13355.6	22.2222
				548	0	0	77.7778	366.667	22.2222
				556	0	11.1111	22.2222	33.3333	11.1111
				564	0	11.1111	44.4444	22.2222	0
				572	0	0	44.4444	22.2222	0
				580	0	0	44.4444	0	0
				588	0	0	66.6667	66.6667	0
				596	0	0	177.778	144.444	0
				604	0	0	233.333	133.333	0
				612	0	0	211.111	155.556	0
				620	0	0	111.111	255.556	0
				628	0	0	0	200	0
				636	0	0	33.3333	188.889	0
				644	0	0	11.1111	44.4444	0
				652	0	0	11.1111	0	0
				660	0	0	0	0	0
				668	0	0	0	0	0
				676	0	0	0	0	0
				684	0	0	0	0	0
				692	0	0	0	0	0
				700	0	11.1111	0	0	0
				708	0	0	0	0	0
				716	0	0	0	0	0
				724	0	0	0	0	0
				732	0	0	0	0	0
				740	0	0	0	11.1111	0
				748	0	0	11.1111	0	0
				756	0	0	0	0	0
				764	11.1111	0	0	0	0
				772	0	0	0	0	0
				780	0	0	0	0	0
				788	0	0	0	0	0
				796	11.1111	0	0	0	0
				804	0	0	0	0	0
				812	0	0	0	0	0
				820	0	0	0	0	0
				828	0	0	0	0	0
				836	0	0	0	0	0
				844	0	0	0	0	0
				852	0	0	0	0	0
				860	0	0	0	0	0
				868	0	0	0	0	0
				876	0	0	0	0	0
				884	0	0	0	0	0
				892	0	0	0	0	0
				900	0	0	0	0	0
				908	0	0	11.1111	0	0
				916	0	0	0	0	0
				924	0	0	0	0	0
				932	0	0	0	0	0
				940	0	0	0	0	0
				948	0	0	0	0	0
				956	0	0	0	0	0
				964	0	0	0	0	0
				972	0	0	0	0	0
				980	0	0	0	0	0
				988	0	0	0	0	0
				996	0	0	0	0	0
				1004	0	0	0	0	0
				1012	0	0	0	0	0
				1020	0	0	0	0	0
				1028	0	0	0	0	0
				1036	0	0	0	0	0
				1044	0	0	0	0	0
				1052	0	0	0	0	0
				1060	0	0	0	0	0
				1068	0	0	0	0	0
				1076	0	0	0	0	0
				1084	0	0	0	0	0
				1092	0	0	0	0	0
				1100	0	0	0	0	0
				1108	0	0	0	0	0
				1116	0	0	0	0	0
				1124	0	0	0	0	0
				1132	0	0	0	0	0
				1140	0	0	0	0	0
				1148	0	0	0	0	0
				1156	0	0	0	0	0
				1164	0	0	0	0	0
				1172	0	0	0	0	0
				1180	0	0	0	0	0
				1188	0	0	0	0	0
				1196	0	0	0	0	0
				1204	0	0	0	0	0
				1212	0	0	0	0	0
				1220	0	0	0	0	0
				1228	0	0	0	0	0
				1236	0	0	0	0	0
				1244	0	0	0	0	0
				1252	0	0	0	0	0
				1260	0	0	0	0	0
				1268	0	0	0	0	0
				1276	0	0	0	0	0
				1284	0	0	0	0	0
				1292	0	0	0	0	0
				1300	0	0	0	0	0
				1308	0	0	0	0	0
				1316	0	0	0	0	0
				1324	0	0	0	0	0
				1332	0	0	0	0	0
				1340	0	0	0	0	0
				1348	0	0	0	0	0
				1356	0	0	11.1111	0	0
				1364	0	0	0	0	0
				1372	0	0	0	0	0
				1380	0	0	0	0	0
				1388	0	0	0	0	0
				1396	0	0	0	0	0
				1404	0	0	0	0	0
				1412	0	0	0	0	0
				1420	0	0	0	0	0
				1428	0	0	0	0	0
				1436	0	0	0	0	0
				1444	0	0	0	0	0
				1452	0	0	0	0	0
				1460	0	0	0	0	0
				1468	0	0	0	0	0
				1476	0	0	0	0	0
				1484	0	0	0	0	0
				1492	11.1111	0	0	0	0
				1500	0	0	0	0	0
				1508	0	0	0	0	0
				1516	0	0	0	0	0
				1524	0	0	0	0	0
				1532	0	0	0	0	0
				1540	0	0	0	0	0
				1548	0	0	0	0	0
				1556	0	0	0	0	0
				1564	0	0	0	0	0
				1572	0	0	0	0	0
				1580	0	0	0	0	0
				1588	0	0	0	0	0
				1596	0	0	0	0	0
				1604	0	0	0	0	0
				1612	0	0	0	0	0
				1620	0	0	0	0	0
				1628	0	0	0	0	0
				1636	0	0	0	0	0
				1644	0	0	0	0	0
				1652	0	0	11.1111	0	0
				1660	0	0	0	0	0
				1668	0	0	0	0	0
				1676	0	0	0	0	0
				1684	0	0	0	0	0
				1692	0	0	0	0	0
				1700	0	0	0	0	0
				1708	0	0	0	0	0
				1716	0	0	0	0	0
				1724	0	0	0	0	0
				1732	0	0	0	0	0
				1740	0	0	0	0	0
				1748	0	0	0	0	0
				1756	0	0	0	0	0
				1764	0	0	0	0	0
				1772	0	0	0	0	0
				1780	0	0	0	0	0
				1788	0	0	0	0	0
				1796	0	0	0	0	0
				1804	0	0	0	0	0
				1812	0	0	0	0	0
				1820	0	0	0	0	0
				1828	0	0	0	0	0
				1836	0	0	0	0	0
				1844	0	0	0	0	0
				1852	0	0	0	0	0
				1860	0	0	0	0	0
				1868	0	0	0	0	0
				1876	0	0	0	0	0
				1884	0	0	0	0	0
				1892	0	0	0	0	0
				1900	0	0	0	0	0
				1908	0	0	0	0	0
				1916	0	0	0	0	0
				1924	0	0	0	0	0
				1932	0	0	0	0	0
				1940	0	0	0	0	0
				1948	0	0	0	0	0
				1956	0	0	0	0	0
				1964	0	0	0	0	0
				1972	0	0	0	0	0
				1980	0	0	0	0	0
				1988	0	0	0	0	0
				1996	0	0	0	0	0
				2004	0	0	0	0	0
				2012	0	0	0	0	0
				2020	0	0	0	0	0
				2028	0	0	0	0	0
				2036	0	0	0	0	0
				2044	0	0	0	0	0
				Modal concentration	93066.7	47700	38788.9	36211.1	47700

## Sheet: Fig.5
Fig. 5
Tween-20 concentration	Staining efficiency	Counting efficiency		Note: Each sample was measured in triplicate, and the mean value was presented.
Volume %	-	-
0	0.000324206	1.74434
0.00102313	0.265566	1.409
0.00511357	0.453213	1.57009
0.0102333	0.0158076	1.09157
0.0511593	0.986088	0.940406
0.102654	0.989463	1.00137
0.491671	0.979607	0.999515
0.935944	0.9801	0.98497

## Sheet: Fig.7
Fig. 7	(a)	(a)	(b)	(b)
Reference concentration	Measured concentration* (Fluorescence particles)	Measured concentration* (Total particles)	Staining efficiency	Counting efficiency		Note: Each sample was measured in triplicate, and the mean value was presented.
particles mL-1	particles mL-1	particles mL-1	-	-
965.893	855.556	822.222	1.05898	0.851256
5706.28	5800	5955.56	0.973656	1.04368
11311.3	10244.4	10200	1.00454	0.90175
56100.9	52822.2	53133.3	0.994078	0.947103
101239	95000	95788.9	0.991753	0.946165
Slope:	0.938534	0.946142
Intercept:	35.013	3.81679
Correlation coefficient:	0.999972	0.999957

## Sheet: Fig.8
Fig. 8	(a)	(a)	(b)	(b)
Sample	Staining efficiency	Expanded uncertainty (k = 2)	Recovery rate	Expanded uncertainty (k = 2)		Note: For each size, three replicate samples were measured in triplicate, and the mean value was presented.
-	-	-	-	-
2 μm	0.995789	0.00499904	0.967513	0.0279365
5 μm	0.975936	0.00326065	0.906049	0.0223161
10 μm	0.997422	0.0031902	0.799204	0.125912

## Sheet: Fig.9
Fig. 9	(a)	(a)	(b)	(b)
Sample	Recovery rate	Expanded uncertainty (k = 2)	Corrected recovery rate	Expanded uncertainty (k = 2)		Note: For each size, three replicate samples were measured in triplicate, and the mean value was presented.
-	-	-	-	-
2 μm	0.965165	0.0302648	0.993385	0.037586
5 μm	0.917274	0.0224484	0.988006	0.0294168
10 μm	0.677851	0.0788072	0.845884	0.0995937

## Sheet: Raw count data
Raw count data for Fig.7
Sample	Particle diameter	Nominal concentration	Fluorescent particle count	Total particle count*	Measured volume	Dilution factor (DF)	Number concentration of Standard suspension		Note: "Total particle count" refers to the sum of the counts for "Fluorescent particle" and "Nonfluorescent particle". (See Fig. 2.)
	(μm)	(particles mL-1)	(particles)	(particles)	(μL)	-	(particles mL-1)
2μm-1k-1	2	1000	34	47	30	1163.42	1.12374e+06
2μm-1k-2	2	1000	28	42	30	1163.42	1.12374e+06
2μm-1k-3	2	1000	16	28	30	1163.42	1.12374e+06
2μm-5k-1	2	5000	162	180	30	196.93	1.12374e+06
2μm-5k-2	2	5000	168	188	30	196.93	1.12374e+06
2μm-5k-3	2	5000	193	211	30	196.93	1.12374e+06
2μm-10k-1	2	10000	312	328	30	99.3461	1.12374e+06
2μm-10k-2	2	10000	311	323	30	99.3461	1.12374e+06
2μm-10k-3	2	10000	300	310	30	99.3461	1.12374e+06
2μm-50k-1	2	50000	1639	1657	30	20.0306	1.12374e+06
2μm-50k-2	2	50000	1532	1560	30	20.0306	1.12374e+06
2μm-50k-3	2	50000	1584	1608	30	20.0306	1.12374e+06
2μm-100k-1	2	900000	2837	2878	30	11.0998	1.12374e+06
2μm-100k-2	2	900000	2907	2941	30	11.0998	1.12374e+06
2μm-100k-3	2	900000	2807	2845	30	11.0998	1.12374e+06
Blank-1	-	0	1	14	30	-	-
Blank-2	-	0	0	14	30	-	-
Blank-3	-	0	0	15	30	-	-
Raw count data for Fig.8
Sample	Particle diameter	Nominal concentration	Fluorescent particle count	Total particle count*	Measured volume	Dilution factor (DF)	Number concentration of Standard suspension
	(μm)	(particles mL-1)	(particles)	(particles)	(μL)	-	(particles mL-1)
2μm-1-1	2	90000	2883	2926	30	11.058	1.12374e+06
2μm-1-2	2	90000	2934	2995	30	11.058	1.12374e+06
2μm-1-3	2	90000	2889	2916	30	11.058	1.12374e+06
2μm-2-1	2	90000	2964	2990	30	11.0638	1.12374e+06
2μm-2-2	2	90000	2900	2926	30	11.0638	1.12374e+06
2μm-2-3	2	90000	2967	2998	30	11.0638	1.12374e+06
2μm-3-1	2	90000	3020	3045	30	11.0188	1.12374e+06
2μm-3-2	2	90000	3055	3076	30	11.0188	1.12374e+06
2μm-3-3	2	90000	2964	3001	30	11.0188	1.12374e+06
Blank-1-1	-	0	0	24	30	-	-
Blank-1-2	-	0	0	19	30	-	-
Blank-1-3	-	0	2	24	30	-	-
Blank-2-1	-	0	0	25	30	-	-
Blank-2-2	-	0	0	11	30	-	-
Blank-2-3	-	0	0	30	30	-	-
Blank-3-1	-	0	0	13	30	-	-
Blank-3-2	-	0	0	18	30	-	-
Blank-3-3	-	0	0	23	30	-	-
5μm-1-1	5	90000	2285	2354	30	10.9927	909050
5μm-1-2	5	90000	2254	2309	30	10.9927	909050
5μm-1-3	5	90000	2229	2286	30	10.9927	909050
5μm-2-1	5	90000	2245	2296	30	10.9471	909050
5μm-2-2	5	90000	2168	2217	30	10.9471	909050
5μm-2-3	5	90000	2244	2302	30	10.9471	909050
5μm-3-1	5	90000	2342	2399	30	10.9859	909050
5μm-3-2	5	90000	2260	2317	30	10.9859	909050
5μm-3-3	5	90000	2236	2292	30	10.9859	909050
Blank-1-1	-	0	0	0	30	-	-
Blank-1-2	-	0	0	2	30	-	-
Blank-1-3	-	0	0	2	30	-	-
Blank-2-1	-	0	0	1	30	-	-
Blank-2-2	-	0	0	1	30	-	-
Blank-2-3	-	0	0	0	30	-	-
Blank-3-1	-	0	1	2	30	-	-
Blank-3-2	-	0	0	1	30	-	-
Blank-3-3	-	0	0	1	30	-	-
10μm-1-1	10	90000	2754	2764	30	10.9863	983245
10μm-1-2	10	90000	2430	2453	30	10.9863	983245
10μm-1-3	10	90000	2252	2254	30	10.9863	983245
10μm-2-1	10	90000	2249	2254	30	10.9694	983245
10μm-2-2	10	90000	1885	1892	30	10.9694	983245
10μm-2-3	10	90000	1700	1706	30	10.9694	983245
10μm-3-1	10	90000	2249	2255	30	10.9289	983245
10μm-3-2	10	90000	1996	2005	30	10.9289	983245
10μm-3-3	10	90000	1838	1842	30	10.9289	983245
Blank-1-1	-	0	0	3	30	-	-
Blank-1-2	-	0	0	2	30	-	-
Blank-1-3	-	0	0	2	30	-	-
Blank-2-1	-	0	0	2	30	-	-
Blank-2-2	-	0	0	1	30	-	-
Blank-2-3	-	0	0	4	30	-	-
Blank-3-1	-	0	0	4	30	-	-
Blank-3-2	-	0	0	1	30	-	-
Blank-3-3	-	0	0	1	30	-	-
Raw count data for Fig.9
Sample	Particle diameter	Nominal concentration	Fluorescent particle count	Total particle count*	Measured volume	Dilution factor (DF)	Number concentration of Standard suspension
	(μm)	(particles mL-1)	(particles)	(particles)	(μL)	-	(particles mL-1)
2μm-1-1	2	40000	1272	1966	30	24.7683	1.12374e+06
2μm-1-2	2	40000	1311	1963	30	24.7683	1.12374e+06
2μm-1-3	2	40000	1333	2087	30	24.7683	1.12374e+06
2μm-2-1	2	40000	1267	1798	30	24.6605	1.12374e+06
2μm-2-2	2	40000	1282	1827	30	24.6605	1.12374e+06
2μm-2-3	2	40000	1353	1879	30	24.6605	1.12374e+06
2μm-3-1	2	40000	1258	2087	30	24.6529	1.12374e+06
2μm-3-2	2	40000	1365	2172	30	24.6529	1.12374e+06
2μm-3-3	2	40000	1431	2235	30	24.6529	1.12374e+06
Blank-1-1	-	0	3	612	30	-	-
Blank-1-2	-	0	4	604	30	-	-
Blank-1-3	-	0	0	565	30	-	-
Blank-2-1	-	0	1	595	30	-	-
Blank-2-2	-	0	0	567	30	-	-
Blank-2-3	-	0	3	562	30	-	-
Blank-3-1	-	0	1	593	30	-	-
Blank-3-2	-	0	0	617	30	-	-
Blank-3-3	-	0	1	550	30	-	-
5μm-1-1	5	40000	1056	1172	30	24.6981	909050
5μm-1-2	5	40000	1020	1139	30	24.6981	909050
5μm-1-3	5	40000	1015	1131	30	24.6981	909050
5μm-2-1	5	40000	1024	1130	30	24.6459	909050
5μm-2-2	5	40000	971	1068	30	24.6459	909050
5μm-2-3	5	40000	1036	1140	30	24.6459	909050
5μm-3-1	5	40000	985	1103	30	24.7232	909050
5μm-3-2	5	40000	1045	1179	30	24.7232	909050
5μm-3-3	5	40000	968	1073	30	24.7232	909050
Blank-1-1	-	0	0	95	30	-	-
Blank-1-2	-	0	0	74	30	-	-
Blank-1-3	-	0	0	92	30	-	-
Blank-2-1	-	0	0	79	30	-	-
Blank-2-2	-	0	0	93	30	-	-
Blank-2-3	-	0	0	88	30	-	-
Blank-3-1	-	0	1	98	30	-	-
Blank-3-2	-	0	0	81	30	-	-
Blank-3-3	-	0	0	87	30	-	-
10μm-1-1	10	40000	816	832	30	24.6787	983245
10μm-1-2	10	40000	769	784	30	24.6787	983245
10μm-1-3	10	40000	709	733	30	24.6787	983245
10μm-2-1	10	40000	920	957	30	24.6053	983245
10μm-2-2	10	40000	908	949	30	24.6053	983245
10μm-2-3	10	40000	890	922	30	24.6053	983245
10μm-3-1	10	40000	876	900	30	24.4642	983245
10μm-3-2	10	40000	730	751	30	24.4642	983245
10μm-3-3	10	40000	703	721	30	24.4642	983245
Blank-1-1	-	0	0	80	30	-	-
Blank-1-2	-	0	0	73	30	-	-
Blank-1-3	-	0	0	83	30	-	-
Blank-2-1	-	0	0	88	30	-	-
Blank-2-2	-	0	1	82	30	-	-
Blank-2-3	-	0	0	73	30	-	-
Blank-3-1	-	0	0	81	30	-	-
Blank-3-2	-	0	0	68	30	-	-
Blank-3-3	-	0	0	84	30	-	-
